# Supplementary material
Source: PubMed Central journal article supplement (PMC2672563)
Supplement: NIHMS51479-supplement-01.pdf [file NIHMS51479-supplement-01.pdf]

**Supplementary Table.** Means, standard deviations, and statistics for 39 cortical Brodmann area relative volumes by group, hemisphere, and matter type. Relative size is calculated as the ratio of area of ROI volume/total brain volume multiplied by 100.

| BA                | Healthy Controls<br><i>n</i> = 148 |      | Schizotypal patients<br><i>n</i> = 79 |      | Controls vs. SPDs<br><i>df</i> = 225 |         | Schizophrenia patients<br><i>n</i> = 57 |      | Controls vs. Sz pts<br><i>df</i> = 203 |         | SPDs vs. Sz pts<br><i>df</i> = 134 |         |
|-------------------|------------------------------------|------|---------------------------------------|------|--------------------------------------|---------|-----------------------------------------|------|----------------------------------------|---------|------------------------------------|---------|
|                   | Mean                               | SD   | Mean                                  | SD   | t- value                             | p       | Mean                                    | SD   | t- value                               | p       | t- value                           | p       |
| <sup>a</sup> 1L G | 1.16                               | 0.17 | 1.13                                  | 0.14 | 0.91                                 | 0.364   | 1.09                                    | 0.14 | 2.44                                   | * 0.016 | 1.71                               | 0.089   |
| <sup>a</sup> 1L W | 0.86                               | 0.16 | 0.90                                  | 0.15 | -2.15                                | * 0.032 | 0.94                                    | 0.20 | -3.30                                  | * 0.001 | -1.38                              | 0.170   |
| <sup>a</sup> 1R G | 1.19                               | 0.17 | 1.13                                  | 0.16 | 2.44                                 | * 0.015 | 1.14                                    | 0.16 | 2.08                                   | * 0.039 | -0.07                              | 0.947   |
| <sup>a</sup> 1R W | 1.00                               | 0.18 | 1.03                                  | 0.15 | -0.88                                | 0.378   | 1.10                                    | 0.18 | -3.30                                  | * 0.001 | -2.50                              | * 0.014 |
| 4L G              | 1.34                               | 0.18 | 1.30                                  | 0.14 | 1.44                                 | 0.151   | 1.25                                    | 0.16 | 3.47                                   | * 0.001 | 2.28                               | * 0.024 |
| 4L W              | 1.13                               | 0.21 | 1.15                                  | 0.17 | -0.88                                | 0.382   | 1.27                                    | 0.24 | -4.25                                  | * 0.000 | -3.44                              | * 0.001 |
| 4R G              | 1.26                               | 0.19 | 1.21                                  | 0.15 | 2.27                                 | * 0.024 | 1.17                                    | 0.16 | 3.26                                   | * 0.001 | 1.32                               | 0.189   |
| 4R W              | 1.25                               | 0.22 | 1.26                                  | 0.17 | -0.35                                | 0.727   | 1.38                                    | 0.19 | -4.05                                  | * 0.000 | -3.93                              | * 0.000 |
| 6L G              | 1.97                               | 0.23 | 1.91                                  | 0.18 | 2.04                                 | * 0.043 | 1.93                                    | 0.23 | 1.15                                   | 0.253   | -0.55                              | 0.582   |
| 6L W              | 1.61                               | 0.25 | 1.64                                  | 0.25 | -0.92                                | 0.358   | 1.73                                    | 0.27 | -2.91                                  | * 0.004 | -1.85                              | 0.066   |
| 6R G              | 1.83                               | 0.25 | 1.78                                  | 0.17 | 1.74                                 | 0.084   | 1.77                                    | 0.24 | 1.53                                   | 0.127   | 0.12                               | 0.903   |
| 6R W              | 1.78                               | 0.30 | 1.78                                  | 0.25 | -0.02                                | 0.984   | 1.92                                    | 0.24 | -3.22                                  | * 0.001 | -3.35                              | * 0.001 |
| 7aL G             | 0.39                               | 0.06 | 0.38                                  | 0.05 | 0.91                                 | 0.362   | 0.37                                    | 0.05 | 1.70                                   | 0.090   | 0.81                               | 0.421   |
| 7aL W             | 0.28                               | 0.06 | 0.28                                  | 0.04 | -0.94                                | 0.349   | 0.30                                    | 0.06 | -2.59                                  | * 0.010 | -1.83                              | 0.069   |
| 7aR G             | 0.39                               | 0.06 | 0.38                                  | 0.05 | 1.12                                 | 0.266   | 0.37                                    | 0.05 | 2.04                                   | * 0.043 | 1.14                               | 0.258   |
| 7aR W             | 0.28                               | 0.06 | 0.29                                  | 0.05 | -1.79                                | 0.074   | 0.31                                    | 0.06 | -3.10                                  | * 0.002 | -1.49                              | 0.138   |
| 7bL G             | 0.86                               | 0.12 | 0.84                                  | 0.11 | 0.84                                 | 0.403   | 0.81                                    | 0.11 | 2.39                                   | * 0.018 | 1.56                               | 0.122   |
| 7bL W             | 0.48                               | 0.10 | 0.48                                  | 0.08 | -0.06                                | 0.950   | 0.50                                    | 0.09 | -1.42                                  | 0.157   | -1.40                              | 0.165   |
| 7bR G             | 0.86                               | 0.12 | 0.86                                  | 0.11 | -0.10                                | 0.919   | 0.83                                    | 0.10 | 1.89                                   | 0.061   | 1.93                               | 0.056   |
| 7bR W             | 0.42                               | 0.10 | 0.45                                  | 0.10 | -2.22                                | * 0.028 | 0.45                                    | 0.09 | -2.13                                  | * 0.034 | -0.10                              | 0.923   |
| 8L G              | 0.98                               | 0.15 | 0.97                                  | 0.09 | 0.69                                 | 0.489   | 0.98                                    | 0.12 | 0.12                                   | 0.901   | -0.55                              | 0.584   |
| 8L W              | 0.77                               | 0.18 | 0.75                                  | 0.13 | 0.76                                 | 0.445   | 0.77                                    | 0.14 | -0.07                                  | 0.945   | -0.83                              | 0.405   |
| 8R G              | 0.91                               | 0.15 | 0.90                                  | 0.10 | 0.48                                 | 0.631   | 0.90                                    | 0.12 | 0.43                                   | 0.670   | 0.03                               | 0.980   |
| 8R W              | 0.87                               | 0.18 | 0.84                                  | 0.13 | 1.31                                 | 0.191   | 0.89                                    | 0.15 | -0.82                                  | 0.414   | -2.11                              | * 0.037 |
| 9L G              | 1.21                               | 0.13 | 1.19                                  | 0.10 | 1.22                                 | 0.223   | 1.16                                    | 0.14 | 2.35                                   | * 0.020 | 1.39                               | 0.168   |
| 9L W              | 0.59                               | 0.13 | 0.60                                  | 0.11 | -0.07                                | 0.948   | 0.60                                    | 0.13 | -0.20                                  | 0.841   | -0.14                              | 0.888   |
| 9R G              | 1.16                               | 0.14 | 1.12                                  | 0.12 | 2.21                                 | * 0.028 | 1.10                                    | 0.13 | 2.82                                   | * 0.005 | 0.88                               | 0.381   |
| 9R W              | 0.75                               | 0.14 | 0.73                                  | 0.13 | 0.63                                 | 0.529   | 0.78                                    | 0.15 | -1.45                                  | 0.150   | -1.91                              | 0.059   |
| 10L G             | 0.85                               | 0.11 | 0.87                                  | 0.12 | -1.55                                | 0.123   | 0.76                                    | 0.13 | 4.72                                   | * 0.000 | 5.01                               | * 0.000 |
| 10L W             | 0.21                               | 0.08 | 0.24                                  | 0.08 | -3.18                                | * 0.002 | 0.21                                    | 0.07 | -0.48                                  | 0.633   | 2.23                               | * 0.028 |
| 10R G             | 0.87                               | 0.11 | 0.86                                  | 0.11 | 0.45                                 | 0.650   | 0.78                                    | 0.12 | 4.80                                   | * 0.000 | 3.89                               | * 0.000 |
| 10R W             | 0.28                               | 0.10 | 0.30                                  | 0.09 | -1.46                                | 0.147   | 0.29                                    | 0.09 | -0.43                                  | 0.666   | 0.82                               | 0.413   |
| 11L G             | 0.33                               | 0.04 | 0.32                                  | 0.04 | 1.03                                 | 0.306   | 0.31                                    | 0.04 | 3.25                                   | * 0.001 | 2.09                               | * 0.038 |
| 11L W             | 0.25                               | 0.04 | 0.26                                  | 0.05 | -1.74                                | 0.083   | 0.26                                    | 0.05 | -1.55                                  | 0.123   | 0.00                               | 1.000   |

|       |      |      |      |      |       |         |      |      |       |         |       |         |
|-------|------|------|------|------|-------|---------|------|------|-------|---------|-------|---------|
| 11R G | 0.32 | 0.04 | 0.32 | 0.04 | 0.80  | 0.423   | 0.30 | 0.04 | 3.06  | * 0.003 | 1.93  | 0.055   |
| 11R W | 0.29 | 0.04 | 0.29 | 0.05 | -1.45 | 0.147   | 0.29 | 0.05 | -0.93 | 0.354   | 0.32  | 0.753   |
| 12L G | 0.25 | 0.03 | 0.25 | 0.03 | 1.53  | 0.127   | 0.24 | 0.03 | 3.73  | * 0.000 | 2.27  | * 0.025 |
| 12L W | 0.13 | 0.02 | 0.14 | 0.02 | -1.80 | 0.073   | 0.15 | 0.03 | -2.88 | * 0.004 | -1.26 | 0.209   |
| 12R G | 0.24 | 0.03 | 0.24 | 0.03 | 0.66  | 0.507   | 0.23 | 0.03 | 3.26  | * 0.001 | 2.19  | * 0.030 |
| 12R W | 0.16 | 0.03 | 0.17 | 0.03 | -1.93 | 0.055   | 0.17 | 0.03 | -1.43 | 0.154   | 0.16  | 0.871   |
| 17L G | 1.07 | 0.19 | 1.07 | 0.19 | -0.28 | 0.777   | 0.98 | 0.22 | 2.84  | * 0.005 | 2.67  | * 0.009 |
| 17L W | 0.45 | 0.12 | 0.47 | 0.10 | -0.76 | 0.450   | 0.47 | 0.12 | -1.07 | 0.287   | -0.41 | 0.684   |
| 17R G | 1.04 | 0.20 | 1.07 | 0.19 | -1.09 | 0.279   | 0.93 | 0.19 | 3.55  | * 0.000 | 4.22  | * 0.000 |
| 17R W | 0.31 | 0.10 | 0.34 | 0.09 | -2.57 | * 0.011 | 0.35 | 0.11 | -2.29 | * 0.023 | -0.12 | 0.905   |
| 18L G | 0.85 | 0.12 | 0.85 | 0.13 | -0.03 | 0.974   | 0.77 | 0.14 | 3.52  | * 0.001 | 3.02  | * 0.003 |
| 18L W | 0.46 | 0.08 | 0.47 | 0.08 | -0.87 | 0.385   | 0.49 | 0.08 | -1.83 | 0.069   | -0.95 | 0.346   |
| 18R G | 0.87 | 0.13 | 0.87 | 0.12 | -0.30 | 0.762   | 0.78 | 0.13 | 4.20  | * 0.000 | 4.04  | * 0.000 |
| 18R W | 0.36 | 0.07 | 0.39 | 0.08 | -2.99 | * 0.003 | 0.40 | 0.09 | -3.33 | * 0.001 | -0.66 | 0.511   |
| 19L G | 1.20 | 0.17 | 1.19 | 0.17 | 0.70  | 0.484   | 1.12 | 0.19 | 2.93  | * 0.004 | 2.04  | * 0.044 |
| 19L W | 0.67 | 0.11 | 0.68 | 0.09 | -0.63 | 0.529   | 0.70 | 0.11 | -1.34 | 0.183   | -0.79 | 0.429   |
| 19R G | 1.19 | 0.17 | 1.20 | 0.16 | -0.54 | 0.588   | 1.09 | 0.17 | 3.90  | * 0.000 | 4.03  | * 0.000 |
| 19R W | 0.56 | 0.10 | 0.60 | 0.10 | -2.94 | * 0.004 | 0.60 | 0.12 | -2.38 | * 0.018 | 0.08  | 0.939   |
| 20L G | 0.73 | 0.11 | 0.74 | 0.09 | -0.58 | 0.566   | 0.68 | 0.11 | 3.14  | * 0.002 | 3.48  | * 0.001 |
| 20L W | 0.39 | 0.07 | 0.38 | 0.06 | 1.46  | 0.146   | 0.41 | 0.09 | -1.93 | 0.056   | -2.91 | * 0.004 |
| 20R G | 0.65 | 0.10 | 0.66 | 0.09 | -0.53 | 0.596   | 0.59 | 0.11 | 3.70  | * 0.000 | 3.93  | * 0.000 |
| 20R W | 0.43 | 0.07 | 0.45 | 0.08 | -1.58 | 0.116   | 0.47 | 0.09 | -3.60 | * 0.000 | -1.84 | 0.067   |
| 21L G | 1.08 | 0.11 | 1.01 | 0.11 | 4.68  | * 0.000 | 0.99 | 0.14 | 5.02  | * 0.000 | 1.03  | 0.304   |
| 21L W | 0.39 | 0.09 | 0.37 | 0.08 | 1.81  | 0.071   | 0.40 | 0.09 | -0.68 | 0.500   | -2.11 | * 0.037 |
| 21R G | 0.99 | 0.11 | 0.93 | 0.10 | 3.58  | * 0.000 | 0.91 | 0.13 | 4.25  | * 0.000 | 1.11  | 0.270   |
| 21R W | 0.42 | 0.09 | 0.43 | 0.09 | -1.08 | 0.282   | 0.47 | 0.10 | -3.64 | * 0.000 | -2.35 | * 0.020 |
| 22L G | 1.09 | 0.11 | 1.07 | 0.10 | 1.04  | 0.301   | 1.00 | 0.13 | 4.82  | * 0.000 | 3.64  | * 0.000 |
| 22L W | 0.34 | 0.08 | 0.33 | 0.07 | 0.75  | 0.453   | 0.35 | 0.10 | -1.44 | 0.152   | -1.83 | 0.069   |
| 22R G | 0.99 | 0.11 | 0.98 | 0.10 | 0.80  | 0.423   | 0.91 | 0.13 | 4.19  | * 0.000 | 3.28  | * 0.001 |
| 22R W | 0.41 | 0.09 | 0.44 | 0.11 | -2.44 | * 0.015 | 0.45 | 0.10 | -3.15 | * 0.002 | -0.71 | 0.482   |
| 23L G | 0.20 | 0.03 | 0.18 | 0.03 | 3.36  | * 0.001 | 0.19 | 0.03 | 1.65  | 0.100   | -1.18 | 0.239   |
| 23L W | 0.27 | 0.04 | 0.28 | 0.04 | -1.49 | 0.138   | 0.28 | 0.04 | -0.31 | 0.760   | 0.87  | 0.388   |
| 23R G | 0.19 | 0.03 | 0.17 | 0.03 | 3.71  | * 0.000 | 0.18 | 0.03 | 1.64  | 0.103   | -1.63 | 0.106   |
| 23R W | 0.26 | 0.04 | 0.27 | 0.04 | -2.61 | * 0.010 | 0.26 | 0.04 | -0.63 | 0.528   | 1.45  | 0.149   |
| 24L G | 0.28 | 0.04 | 0.26 | 0.03 | 2.66  | * 0.008 | 0.27 | 0.04 | 1.47  | 0.143   | -0.66 | 0.509   |
| 24L W | 0.40 | 0.05 | 0.41 | 0.04 | -2.17 | * 0.031 | 0.39 | 0.06 | 0.80  | 0.427   | 2.36  | * 0.020 |
| 24R G | 0.26 | 0.04 | 0.24 | 0.03 | 3.64  | * 0.000 | 0.26 | 0.05 | 0.24  | 0.812   | -2.71 | * 0.008 |
| 24R W | 0.41 | 0.05 | 0.42 | 0.04 | -1.95 | 0.053   | 0.41 | 0.06 | 0.58  | 0.564   | 2.09  | * 0.039 |

|       |      |      |      |      |       |         |      |      |       |         |       |         |
|-------|------|------|------|------|-------|---------|------|------|-------|---------|-------|---------|
| 25L G | 0.17 | 0.03 | 0.16 | 0.02 | 2.81  | * 0.005 | 0.17 | 0.03 | 1.48  | 0.139   | -0.82 | 0.413   |
| 25L W | 0.08 | 0.02 | 0.08 | 0.02 | 0.12  | 0.907   | 0.09 | 0.03 | -2.63 | * 0.009 | -2.66 | * 0.009 |
| 25R G | 0.16 | 0.03 | 0.16 | 0.02 | 1.15  | 0.251   | 0.15 | 0.03 | 1.26  | 0.211   | 0.29  | 0.775   |
| 25R W | 0.10 | 0.02 | 0.10 | 0.02 | 0.94  | 0.346   | 0.11 | 0.03 | -1.94 | 0.054   | -2.64 | * 0.009 |
| 26L G | 0.01 | 0.00 | 0.01 | 0.00 | 0.20  | 0.839   | 0.01 | 0.00 | 1.66  | 0.099   | 1.29  | 0.198   |
| 26L W | 0.01 | 0.00 | 0.01 | 0.00 | -0.92 | 0.358   | 0.01 | 0.00 | -0.73 | 0.467   | 0.06  | 0.951   |
| 26R G | 0.01 | 0.00 | 0.01 | 0.00 | -0.26 | 0.797   | 0.01 | 0.00 | 2.38  | * 0.018 | 2.27  | * 0.025 |
| 26R W | 0.01 | 0.00 | 0.01 | 0.00 | -2.83 | * 0.005 | 0.01 | 0.00 | -2.17 | * 0.031 | 0.50  | 0.616   |
| 27L G | 0.12 | 0.02 | 0.12 | 0.02 | 1.07  | 0.286   | 0.11 | 0.02 | 1.59  | 0.113   | 0.63  | 0.529   |
| 27L W | 0.04 | 0.01 | 0.04 | 0.02 | 2.35  | * 0.020 | 0.04 | 0.02 | -0.53 | 0.599   | -2.24 | * 0.027 |
| 27R G | 0.12 | 0.02 | 0.11 | 0.02 | 0.94  | 0.347   | 0.11 | 0.02 | 3.17  | * 0.002 | 2.24  | * 0.027 |
| 27R W | 0.04 | 0.02 | 0.04 | 0.02 | -1.27 | 0.206   | 0.05 | 0.02 | -2.06 | * 0.040 | -0.76 | 0.449   |
| 28L G | 0.42 | 0.05 | 0.42 | 0.04 | 1.28  | 0.203   | 0.39 | 0.06 | 3.58  | * 0.000 | 2.38  | * 0.019 |
| 28L W | 0.10 | 0.03 | 0.10 | 0.03 | 1.10  | 0.274   | 0.12 | 0.05 | -2.51 | * 0.013 | -2.96 | * 0.004 |
| 28R G | 0.38 | 0.05 | 0.39 | 0.05 | -0.87 | 0.386   | 0.35 | 0.06 | 3.62  | * 0.000 | 3.62  | * 0.000 |
| 28R W | 0.12 | 0.03 | 0.12 | 0.03 | -0.04 | 0.966   | 0.14 | 0.04 | -3.57 | * 0.000 | -2.89 | * 0.005 |
| 29L G | 0.06 | 0.01 | 0.06 | 0.01 | -0.56 | 0.574   | 0.05 | 0.01 | 1.76  | 0.079   | 2.02  | * 0.046 |
| 29L W | 0.04 | 0.01 | 0.04 | 0.01 | -0.61 | 0.539   | 0.04 | 0.01 | -0.02 | 0.980   | 0.43  | 0.670   |
| 29R G | 0.06 | 0.01 | 0.06 | 0.01 | 0.91  | 0.364   | 0.06 | 0.01 | 3.11  | * 0.002 | 2.03  | * 0.045 |
| 29R W | 0.04 | 0.01 | 0.04 | 0.01 | -1.47 | 0.142   | 0.04 | 0.01 | -0.82 | 0.415   | 0.45  | 0.652   |
| 30L G | 0.11 | 0.02 | 0.11 | 0.02 | -0.59 | 0.556   | 0.11 | 0.02 | 2.02  | 0.045   | 2.54  | * 0.012 |
| 30L W | 0.08 | 0.02 | 0.08 | 0.02 | -0.61 | 0.541   | 0.08 | 0.02 | 0.37  | 0.712   | 0.84  | 0.402   |
| 30R G | 0.13 | 0.05 | 0.12 | 0.02 | 1.43  | 0.153   | 0.11 | 0.02 | 2.20  | * 0.029 | 2.34  | * 0.021 |
| 30R W | 0.08 | 0.03 | 0.08 | 0.02 | -1.74 | 0.083   | 0.08 | 0.02 | -0.30 | 0.767   | 1.34  | 0.183   |
| 31L G | 0.43 | 0.05 | 0.42 | 0.04 | 1.62  | 0.106   | 0.42 | 0.05 | 2.28  | * 0.023 | 0.82  | 0.412   |
| 31L W | 0.33 | 0.04 | 0.34 | 0.05 | -1.28 | 0.203   | 0.35 | 0.05 | -2.51 | * 0.013 | -1.15 | 0.254   |
| 31R G | 0.44 | 0.05 | 0.42 | 0.05 | 2.27  | * 0.024 | 0.42 | 0.04 | 2.04  | * 0.042 | -0.03 | 0.973   |
| 31R W | 0.31 | 0.04 | 0.33 | 0.05 | -2.96 | * 0.003 | 0.33 | 0.05 | -2.29 | * 0.023 | 0.36  | 0.718   |
| 32L G | 0.55 | 0.06 | 0.54 | 0.05 | 0.89  | 0.373   | 0.52 | 0.07 | 2.99  | * 0.003 | 2.22  | * 0.028 |
| 32L W | 0.29 | 0.05 | 0.29 | 0.05 | -1.11 | 0.267   | 0.30 | 0.05 | -2.30 | * 0.023 | -1.18 | 0.241   |
| 32R G | 0.51 | 0.06 | 0.51 | 0.05 | 0.97  | 0.335   | 0.50 | 0.05 | 2.22  | * 0.027 | 1.47  | 0.145   |
| 32R W | 0.33 | 0.05 | 0.34 | 0.04 | -1.18 | 0.241   | 0.34 | 0.06 | -0.60 | 0.547   | 0.37  | 0.710   |
| 34L G | 0.03 | 0.01 | 0.02 | 0.01 | 4.31  | * 0.000 | 0.03 | 0.01 | -0.86 | 0.393   | -4.59 | * 0.000 |
| 34L W | 0.00 | 0.00 | 0.00 | 0.00 | 1.48  | 0.139   | 0.01 | 0.00 | -2.20 | * 0.029 | -3.07 | * 0.003 |
| 34R G | 0.02 | 0.01 | 0.02 | 0.01 | 2.92  | * 0.004 | 0.02 | 0.01 | -0.70 | 0.483   | -2.85 | * 0.005 |
| 34R W | 0.01 | 0.00 | 0.01 | 0.00 | -0.57 | 0.567   | 0.01 | 0.00 | -1.87 | 0.063   | -1.16 | 0.250   |
| 35L G | 0.02 | 0.00 | 0.02 | 0.01 | 1.78  | 0.076   | 0.02 | 0.01 | 2.87  | * 0.005 | 1.01  | 0.315   |
| 35L W | 0.01 | 0.00 | 0.01 | 0.00 | 0.14  | 0.889   | 0.01 | 0.00 | -0.08 | 0.935   | -0.18 | 0.858   |

|       |      |      |      |      |       |         |      |      |       |         |       |         |
|-------|------|------|------|------|-------|---------|------|------|-------|---------|-------|---------|
| 35R G | 0.02 | 0.01 | 0.02 | 0.01 | -0.01 | 0.990   | 0.02 | 0.00 | 1.89  | 0.060   | 1.67  | 0.096   |
| 35R W | 0.01 | 0.00 | 0.01 | 0.00 | -1.55 | 0.124   | 0.01 | 0.00 | -1.14 | 0.255   | 0.21  | 0.832   |
| 36L G | 0.62 | 0.08 | 0.62 | 0.07 | -0.14 | 0.893   | 0.57 | 0.08 | 3.69  | * 0.000 | 3.76  | * 0.000 |
| 36L W | 0.26 | 0.06 | 0.27 | 0.06 | -0.86 | 0.389   | 0.29 | 0.07 | -2.75 | * 0.006 | -1.77 | 0.079   |
| 36R G | 0.58 | 0.08 | 0.58 | 0.07 | -0.23 | 0.815   | 0.53 | 0.08 | 3.72  | * 0.000 | 3.60  | * 0.000 |
| 36R W | 0.31 | 0.06 | 0.33 | 0.06 | -2.17 | * 0.031 | 0.34 | 0.07 | -3.03 | * 0.003 | -0.97 | 0.334   |
| 37L G | 0.67 | 0.08 | 0.67 | 0.10 | 0.38  | 0.707   | 0.63 | 0.09 | 3.03  | * 0.000 | 2.15  | * 0.033 |
| 37L W | 0.44 | 0.08 | 0.42 | 0.08 | 2.06  | * 0.041 | 0.44 | 0.09 | 0.13  | 0.900   | -1.47 | 0.145   |
| 37R G | 0.68 | 0.08 | 0.67 | 0.08 | 0.94  | 0.346   | 0.64 | 0.09 | 2.66  | * 0.009 | 1.58  | 0.117   |
| 37R W | 0.39 | 0.07 | 0.41 | 0.07 | -1.32 | 0.188   | 0.43 | 0.08 | -3.03 | * 0.003 | -1.68 | 0.095   |
| 38L G | 0.25 | 0.06 | 0.23 | 0.05 | 1.96  | 0.051   | 0.23 | 0.06 | 2.37  | * 0.019 | 0.72  | 0.474   |
| 38L W | 0.02 | 0.02 | 0.02 | 0.02 | 0.68  | 0.497   | 0.03 | 0.03 | -3.00 | * 0.003 | -3.03 | * 0.003 |
| 38R G | 0.23 | 0.05 | 0.23 | 0.04 | -0.11 | 0.916   | 0.20 | 0.05 | 2.92  | * 0.004 | 2.97  | * 0.003 |
| 38R W | 0.02 | 0.02 | 0.02 | 0.02 | -0.05 | 0.958   | 0.04 | 0.03 | -4.16 | * 0.000 | -3.26 | * 0.001 |
| 39L G | 0.48 | 0.06 | 0.48 | 0.06 | 0.51  | 0.610   | 0.46 | 0.06 | 2.18  | * 0.030 | 1.55  | 0.123   |
| 39L W | 0.19 | 0.04 | 0.19 | 0.04 | 0.42  | 0.675   | 0.19 | 0.05 | -0.24 | 0.807   | -0.56 | 0.574   |
| 39R G | 0.49 | 0.06 | 0.49 | 0.06 | -0.36 | 0.720   | 0.46 | 0.07 | 2.49  | * 0.014 | 2.59  | * 0.011 |
| 39R W | 0.18 | 0.04 | 0.19 | 0.04 | -2.01 | * 0.046 | 0.20 | 0.05 | -2.57 | * 0.011 | -0.73 | 0.468   |
| 40L G | 0.66 | 0.08 | 0.64 | 0.07 | 1.36  | 0.175   | 0.62 | 0.08 | 2.53  | * 0.012 | 1.30  | 0.197   |
| 40L W | 0.37 | 0.07 | 0.37 | 0.06 | -0.22 | 0.827   | 0.37 | 0.08 | -0.39 | 0.696   | -0.20 | 0.838   |
| 40R G | 0.65 | 0.09 | 0.63 | 0.08 | 1.57  | 0.117   | 0.61 | 0.09 | 2.32  | * 0.022 | 0.95  | 0.343   |
| 40R W | 0.41 | 0.07 | 0.42 | 0.07 | -1.17 | 0.243   | 0.43 | 0.07 | -1.76 | 0.079   | -0.64 | 0.525   |
| 41L G | 0.13 | 0.02 | 0.14 | 0.02 | -1.98 | * 0.049 | 0.13 | 0.02 | 1.55  | 0.123   | 3.07  | * 0.003 |
| 41L W | 0.07 | 0.01 | 0.07 | 0.01 | 0.15  | 0.879   | 0.07 | 0.02 | -2.11 | * 0.036 | -1.94 | 0.054   |
| 41R G | 0.13 | 0.02 | 0.13 | 0.02 | 0.06  | 0.952   | 0.12 | 0.02 | 2.78  | * 0.006 | 2.15  | * 0.033 |
| 41R W | 0.08 | 0.02 | 0.08 | 0.02 | -0.86 | 0.389   | 0.09 | 0.02 | -2.17 | * 0.031 | -1.37 | 0.174   |
| 42L G | 0.49 | 0.10 | 0.50 | 0.10 | -0.58 | 0.561   | 0.47 | 0.10 | 1.53  | 0.129   | 1.87  | 0.064   |
| 42L W | 0.46 | 0.12 | 0.48 | 0.11 | -1.50 | 0.135   | 0.47 | 0.12 | -0.49 | 0.624   | 0.76  | 0.449   |
| 42R G | 0.53 | 0.11 | 0.51 | 0.11 | 1.55  | 0.122   | 0.51 | 0.11 | 1.16  | 0.249   | -0.22 | 0.829   |
| 42R W | 0.56 | 0.13 | 0.55 | 0.13 | 0.32  | 0.747   | 0.58 | 0.13 | -1.20 | 0.233   | -1.33 | 0.185   |
| 43L G | 0.27 | 0.04 | 0.26 | 0.04 | 1.19  | 0.235   | 0.25 | 0.03 | 2.45  | * 0.015 | 1.17  | 0.244   |
| 43L W | 0.08 | 0.02 | 0.08 | 0.02 | -1.00 | 0.320   | 0.09 | 0.03 | -2.78 | * 0.006 | -1.77 | 0.079   |
| 43R G | 0.26 | 0.04 | 0.26 | 0.03 | -0.08 | 0.937   | 0.25 | 0.05 | 1.49  | 0.138   | 1.41  | 0.160   |
| 43R W | 0.09 | 0.02 | 0.09 | 0.02 | -0.36 | 0.716   | 0.10 | 0.03 | -3.51 | * 0.001 | -2.72 | * 0.007 |
| 44L G | 0.33 | 0.04 | 0.32 | 0.03 | 2.24  | * 0.026 | 0.31 | 0.04 | 3.44  | * 0.001 | 1.53  | 0.129   |
| 44L W | 0.15 | 0.04 | 0.15 | 0.04 | -0.04 | 0.965   | 0.17 | 0.04 | -3.05 | * 0.003 | -2.89 | * 0.004 |
| 44R G | 0.32 | 0.04 | 0.30 | 0.04 | 2.79  | * 0.006 | 0.30 | 0.05 | 3.34  | * 0.001 | 0.90  | 0.367   |
| 44R W | 0.16 | 0.04 | 0.15 | 0.04 | 1.10  | 0.274   | 0.18 | 0.04 | -4.07 | * 0.000 | -4.22 | * 0.000 |

|       |      |      |      |      |       |         |      |      |       |         |       |         |
|-------|------|------|------|------|-------|---------|------|------|-------|---------|-------|---------|
| 45L G | 0.34 | 0.04 | 0.34 | 0.04 | 1.20  | 0.232   | 0.32 | 0.05 | 3.34  | * 0.001 | 2.13  | * 0.035 |
| 45L W | 0.32 | 0.05 | 0.32 | 0.05 | -0.17 | 0.868   | 0.33 | 0.06 | -1.48 | 0.140   | -1.14 | 0.256   |
| 45R G | 0.33 | 0.04 | 0.32 | 0.04 | 1.90  | 0.059   | 0.31 | 0.04 | 2.93  | * 0.004 | 1.23  | 0.222   |
| 45R W | 0.34 | 0.05 | 0.34 | 0.06 | 0.65  | 0.518   | 0.36 | 0.06 | -2.23 | * 0.027 | -2.36 | * 0.019 |
| 46L G | 0.31 | 0.03 | 0.29 | 0.03 | 2.55  | * 0.011 | 0.29 | 0.04 | 3.05  | * 0.003 | 0.80  | 0.425   |
| 46L W | 0.14 | 0.04 | 0.15 | 0.04 | -1.95 | 0.052   | 0.13 | 0.04 | 1.24  | 0.217   | 2.60  | * 0.010 |
| 46R G | 0.29 | 0.04 | 0.28 | 0.03 | 2.42  | * 0.016 | 0.28 | 0.04 | 2.89  | * 0.004 | 0.81  | 0.418   |
| 46R W | 0.18 | 0.04 | 0.18 | 0.04 | 0.08  | 0.935   | 0.18 | 0.05 | -0.49 | 0.624   | -0.50 | 0.621   |
| 47L G | 0.13 | 0.02 | 0.13 | 0.02 | 1.59  | 0.112   | 0.13 | 0.02 | 0.88  | 0.381   | -0.44 | 0.661   |
| 47L W | 0.19 | 0.02 | 0.19 | 0.03 | -0.74 | 0.463   | 0.20 | 0.03 | -1.42 | 0.157   | -0.69 | 0.493   |
| 47R G | 0.13 | 0.02 | 0.12 | 0.02 | 2.84  | * 0.005 | 0.12 | 0.02 | 2.31  | * 0.022 | -0.17 | 0.863   |
| 47R W | 0.20 | 0.03 | 0.20 | 0.03 | -0.21 | 0.834   | 0.21 | 0.03 | -1.97 | 0.051   | -1.37 | 0.172   |

L=left hemisphere, R=right hemisphere

G=gray matter, W=white matter

<sup>a</sup> Brodmann area 1 values are averaged across Brodmann areas 1, 2, 4 and 5.

\*p<0.05, 2-tailed t-test
